# Supplementary material
Source: MDPI journal article supplement (https://www.mdpi.com/2072-4292/13/22/4498)
Supplement: s1 [file s1]

Archive with 2 entries (2 files):
- remotesensing-1439428-supplementary.pdf
- Supplementary Materials (Fuzzy TOPSIS).xlsx
