# Supplementary material
Source: MDPI journal article supplement (https://www.mdpi.com/2072-4292/13/22/4498)
Supplement: s1 [file s1 › remotesensing-1439428-supplementary.pdf]

### Error matrices for the three classified LULC maps

**Table S1.** Error matrix for the classified LULC map of 2018

| <b>2018</b>                                       | Class types determined from <b>Reference Source</b> |            |          |       |          |
|---------------------------------------------------|-----------------------------------------------------|------------|----------|-------|----------|
| Class types determined from <b>Classified Map</b> |                                                     | Vegetation | Built-up | Water | $\Sigma$ |
|                                                   | Vegetation                                          | 774        | 32       | 10    | 816      |
|                                                   | Built-up                                            | 14         | 157      | 0     | 171      |
|                                                   | Water                                               | 1          | 0        | 12    | 13       |
|                                                   | $\Sigma$                                            | 789        | 189      | 22    | 1000     |

**Table S2.** Error matrix for the classified LULC map of 2003

| <b>2003</b>                                       | Class types determined from <b>Reference Source</b> |            |          |       |          |
|---------------------------------------------------|-----------------------------------------------------|------------|----------|-------|----------|
| Class types determined from <b>Classified Map</b> |                                                     | Vegetation | Built-up | Water | $\Sigma$ |
|                                                   | Vegetation                                          | 810        | 32       | 8     | 850      |
|                                                   | Built-up                                            | 12         | 117      | 0     | 129      |
|                                                   | Water                                               | 5          | 0        | 16    | 21       |
|                                                   | $\Sigma$                                            | 827        | 149      | 24    | 1000     |

**Table S3.** Error matrix for the classified LULC map of 1991

| <b>1991</b>                                       | Class types determined from <b>Reference Source</b> |            |          |       |          |
|---------------------------------------------------|-----------------------------------------------------|------------|----------|-------|----------|
| Class types determined from <b>Classified Map</b> |                                                     | Vegetation | Built-up | Water | $\Sigma$ |
|                                                   | Vegetation                                          | 845        | 37       | 9     | 891      |
|                                                   | Built-up                                            | 13         | 78       | 0     | 91       |
|                                                   | Water                                               | 2          | 0        | 16    | 18       |
|                                                   | $\Sigma$                                            | 789        | 115      | 25    | 1000     |

### Transition probability and transition area matrices of 2018, 2033, and 2048 based on Markov chain model

**Table S4.** Transition probability matrix of 2018 based on past LULC of 1991–2003

|         | Class 1 | Class 2 | Class 3 |
|---------|---------|---------|---------|
| Class 1 | 0.9586  | 0.0327  | 0.0087  |
| Class 2 | 0.1431  | 0.8565  | 0.0003  |
| Class 3 | 0.0445  | 0.0035  | 0.9520  |

**Table S5.** Transition area matrix of 2018 based on past LULC of 1991–2003

|         | Class 1 | Class 2 | Class 3 |
|---------|---------|---------|---------|
| Class 1 | 1897479 | 64727   | 17217   |
| Class 2 | 30747   | 184029  | 75      |
| Class 3 | 1210    | 96      | 25894   |

**Table S6.** *Transition probability matrix of 2033 based on past LULC of 2003–2018*

|         | Class 1 | Class 2 | Class 3 |
|---------|---------|---------|---------|
| Class 1 | 0.9322  | 0.0664  | 0.0013  |
| Class 2 | 0.0419  | 0.9581  | 0.0001  |
| Class 3 | 0.2116  | 0.0049  | 0.7835  |

**Table S7.** *Transition area matrix of 2033 based on past LULC of 2003–2018*

|         | Class 1 | Class 2 | Class 3 |
|---------|---------|---------|---------|
| Class 1 | 1733970 | 123581  | 2474    |
| Class 2 | 14126   | 323350  | 17      |
| Class 3 | 5069    | 117     | 18769   |

**Table S8.** *Transition probability matrix of 2048 based on past LULC of 2003–2018*

|         | Class 1 | Class 2 | Class 3 |
|---------|---------|---------|---------|
| Class 1 | 0.8721  | 0.1256  | 0.0023  |
| Class 2 | 0.0791  | 0.9207  | 0.0001  |
| Class 3 | 0.3633  | 0.0226  | 0.6141  |

**Table S9.** *Transition area matrix of 2048 based on past LULC of 2003–2018*

|         | Class 1 | Class 2 | Class 3 |
|---------|---------|---------|---------|
| Class 1 | 1622154 | 233620  | 4251    |
| Class 2 | 26707   | 310738  | 49      |
| Class 3 | 8702    | 541     | 14712   |

The transition potential maps resulted from Land Change Modeler from expressing the transition from “vegetation” to “built-up” class in the periods of 1991-2003, 2003-2018, and 1991-2018

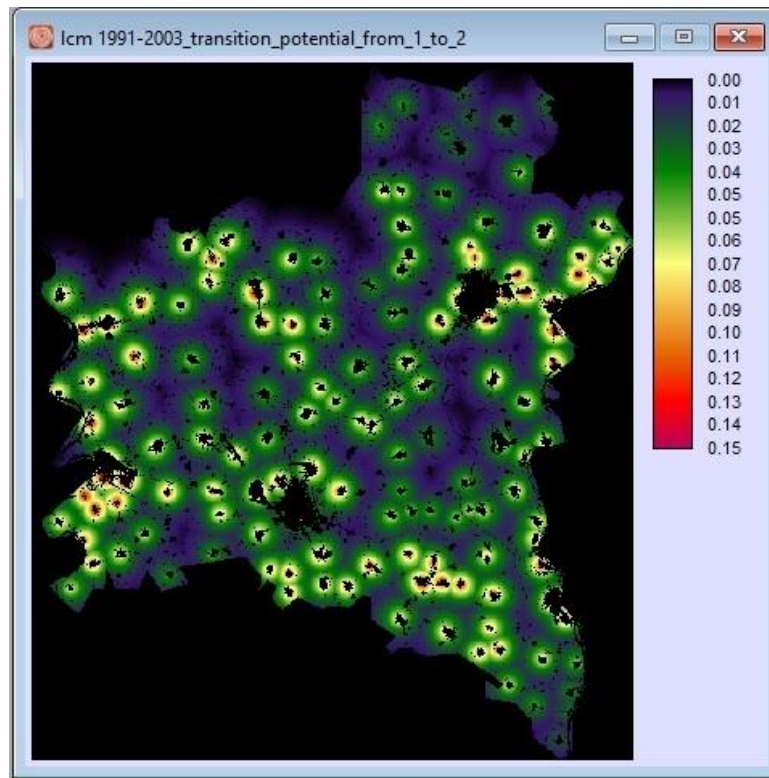

**Figure S1.** LCM 1991-2003\_map of transition potential from vegetation to built-up

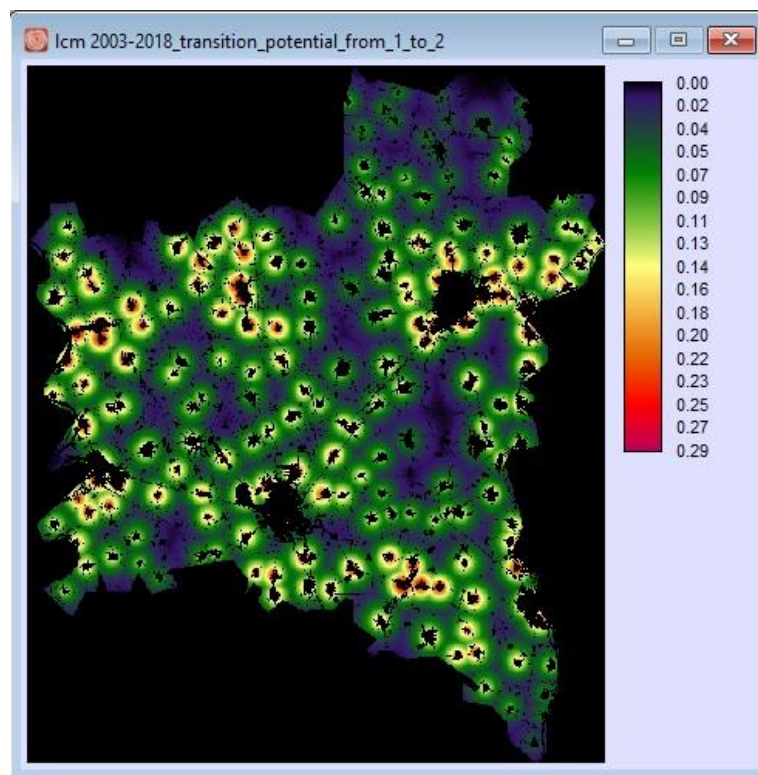

**Figure S2.** LCM 2003-2018\_map of transition potential from vegetation to built-up

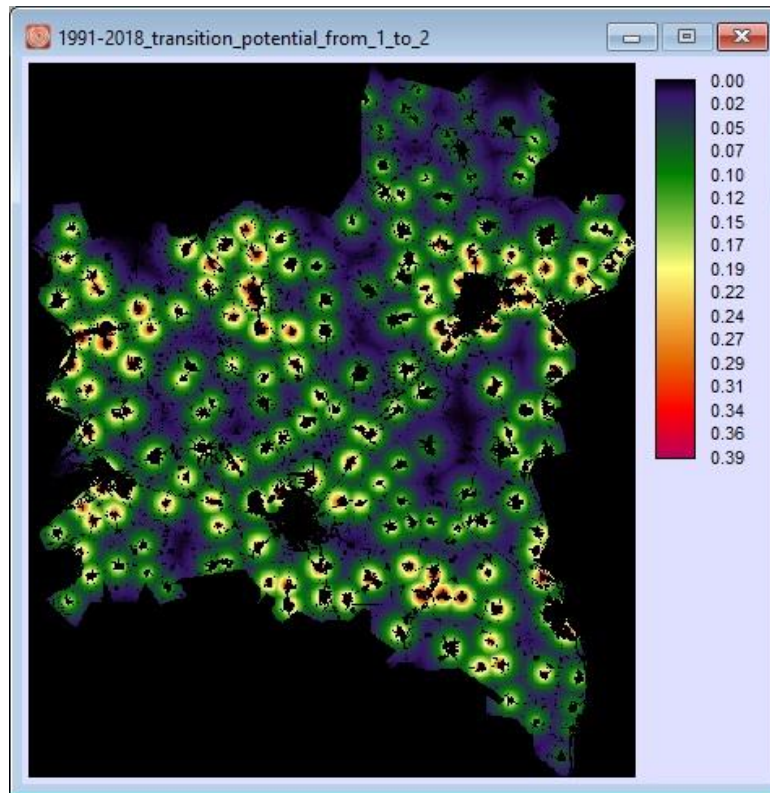

Figure S3. LCM 1991-2018\_map of transition potential from vegetation to built-up

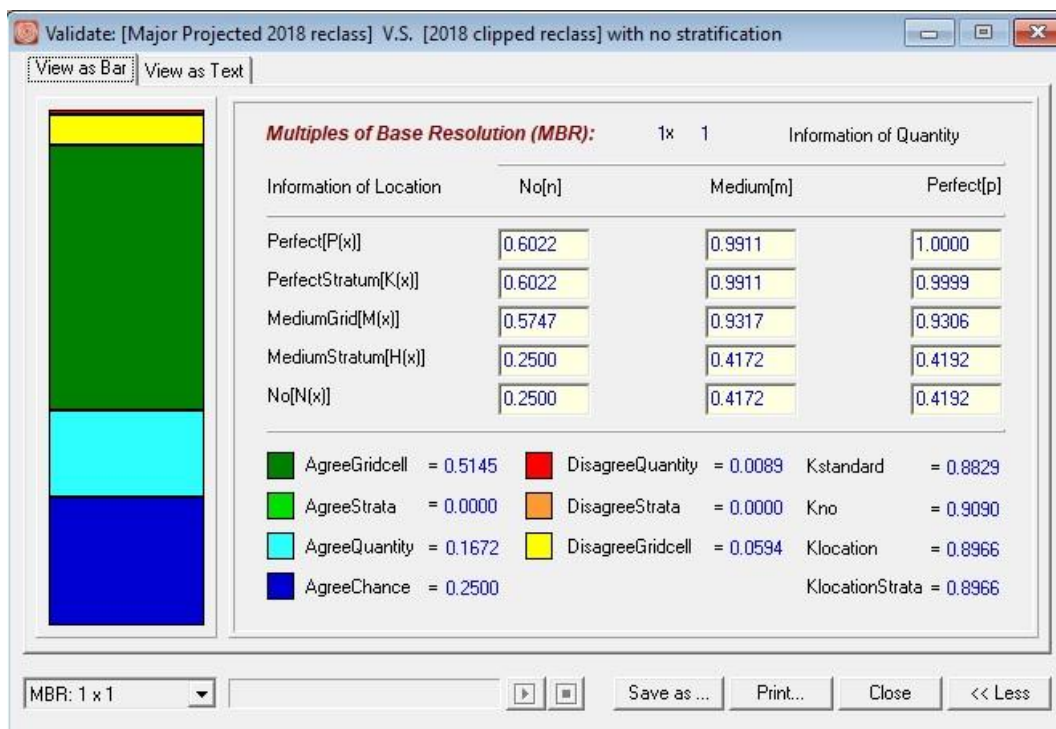

Figure S4. Results of model validation (observed 2018 LULC map V.S. simulated one)
