# Supplementary material
Source: MDPI journal article supplement (https://www.mdpi.com/2072-4292/13/22/4498)
Supplement: s1 [file s1 › Supplementary Materials (Fuzzy TOPSIS).xlsx]

## Sheet: Sheet1
						Steps of applying Fuzzy TOPSIS method
			Decision-Maker 1							Decision-Maker 2
	Weightage	V. High	V.High	High	High	Moderate		Weightage	V. High	V.High	High	High	Moderate
	Criteria	Population growth	Employment	Local development	Area	Socio-economic conditions		Criteria	Population growth	Employment	Local development	Area	Socio-economic conditions
	Mahala	V. High	V. High	High	V. High	High		Mahala	V. High	V. High	High	V. High	High
	Tanta	V. High	V. High	High	V. High	High		Tanta	V. High	V. High	High	V. High	High
	Basun	Moderate	Low	Low	Moderate	Low		Basun	Low	Low	Moderate	Moderate	Moderate
	Zefta	High	Moderate	Low	Moderate	Low		Zefta	Moderate	Low	Moderate	Moderate	Low
	Santa	Low	Moderate	Low	Moderate	Low		Santa	Moderate	Low	Moderate	Moderate	Moderate
	Kafr Elzayat	High	High	Moderate	High	Low		Kafr Elzayat	High	High	Moderate	High	Moderate
	Samanod	Moderate	Low	Moderate	Moderate	Low		Samanod	Low	Low	Moderate	Moderate	Low
	Qotur	High	Moderate	Moderate	High	Moderate		Qotur	High	Moderate	Moderate	High	Low
	Samanod
			Fuzzy Decision-Matrix 1							Fuzzy Decision-Matrix 2
	Weightage	7,9,9	7,9,9	5,7,9	5,7,9	3,5,7		Weightage	7,9,9	7,9,9	5,7,9	5,7,9	3,5,7
	Criteria	Population growth	Employment	Local development	Area	Socio-economic conditions		Criteria	Population growth	Employment	Local development	Area	Socio-economic conditions
	Mahala	7,9,9	7,9,9	5,7,9	7,9,9	5,7,9		Mahala	7,9,9	7,9,9	5,7,9	7,9,9	5,7,9
	Tanta	7,9,9	7,9,9	5,7,9	7,9,9	5,7,9		Tanta	7,9,9	7,9,9	5,7,9	7,9,9	5,7,9
	Basun	3,5,7	1,3,5	1,3,5	3,5,7	1,3,5		Basun	1,3,5	1,3,5	3,5,7	3,5,7	3,5,7
	Zefta	5,7,9	3,5,7	1,3,5	3,5,7	1,3,5		Zefta	3,5,7	1,3,5	3,5,7	3,5,7	1,3,5
	Santa	1,3,5	3,5,7	1,3,5	3,5,7	1,3,5		Santa	3,5,7	1,3,5	3,5,7	3,5,7	3,5,7
	Kafr Elzayat	5,7,9	5,7,9	3,5,7	5,7,9	1,3,5		Kafr Elzayat	5,7,9	5,7,9	3,5,7	5,7,9	3,5,7
	Samanod	3,5,7	1,3,5	3,5,7	3,5,7	1,3,5		Samanod	1,3,5	1,3,5	3,5,7	3,5,7	1,3,5
	Qotur	5,7,9	3,5,7	3,5,7	5,7,9	3,5,7		Qotur	5,7,9	3,5,7	3,5,7	5,7,9	1,3,5
			Combined Decision Matrix
	Weightage	7,9,9	7,9,9	5,7,9	5,7,9	3,5,7
	Criteria	Population growth	Employment	Local development	Area	Socio-economic conditions
	Mahala	7,9,9	7,9,9	5,7,9	7,9,9	5,7,9
	Tanta	7,9,9	7,9,9	5,7,9	7,9,9	5,7,9
	Basun	1,4,7	1,3,5	1,4,7	3,5,7	1,4,7
	Zefta	3,6,9	1,4,7	1,4,7	3,5,7	1,3,5
	Santa	1,4,7	1,4,7	1,4,7	3,5,7	1,4,7
	Kafr Elzayat	5,7,9	5,7,9	3,5,7	5,7,9	1,4,7
	Samanod	1,4,7	1,3,5	3,5,7	3,5,7	1,3,5
	Qotur	5,7,9	3,5,7	3,5,7	5,7,9	1,4,7
			Compute the normalized fuzzy decision matrix
	Weightage	7,9,9	7,9,9	5,7,9	5,7,9	3,5,7
	Criteria	Population growth	Employment	Local development	Area	Socio-economic conditions
	Mahala	0.778,1,1	0.778,1,1	0.556,0.778,1	0.778,1,1	0.556,0.778,1
	Tanta	0.778,1,1	0.778,1,1	0.556,0.778,1	0.778,1,1	0.556,0.778,1
	Basun	0.111,0.444,0.778	0.111,0.333,0.556	0.111,0.444,0.778	0.333,0.556,0.778	0.111,0.444,0.778
	Zefta	0.333,0.667,1	0.111,0.444,0.778	0.111,0.444,0.778	0.333,0.556,0.778	0.111,0.333,0.556
	Santa	0.111,0.444,0.778	0.111,0.444,0.778	0.111,0.444,0.778	0.333,0.556,0.778	0.111,0.444,0.778
	Kafr Elzayat	0.556,0.778,1	0.556,0.778,1	0.333,0.556,0.778	0.556,0.778,1	0.111,0.444,0.778
	Samanod	0.111,0.444,0.778	0.111,0.333,0.556	0.333,0.556,0.778	0.333,0.556,0.778	0.111,0.333,0.556
	Qotur	0.556,0.778,1	0.333,0.556,0.778	0.333,0.556,0.778	0.556,0.778,1	0.111,0.444,0.778
			Compute the weighted normalized fuzzy decision matrix
	Criteria	Population growth	Employment	Local development	Area	Socio-economic conditions
	Mahala	5.446,9,9	5.446,9,9	2.78,5.446,9	3.89,7,9	1.668,3.89,7
	Tanta	5.446,9,9	5.446,9,9	2.78,5.446,9	3.89,7,9	1.668,3.89,7
	Basun	0.777,3.996,7.002	0.777,2.997,5.004	0.555,3.108,7.002	1.665,3.892,7.002	0.333,2.22,5.446
	Zefta	2.331,6.003,9	0.777,3.996,7.002	0.555,3.108,7.002	1.665,3.892,7.002	0.333,2.22,3.892
	Santa	0.777,3.996,7.002	0.777,3.996,7.002	0.555,3.108,7.002	1.665,3.892,7.002	0.333,2.22,5.446
	Kafr Elzayat	3.892,7.002,9	3.892,7.002,9	1.665,3.892,7.002	2.78,5.446,9	0.333,2.22,5.446
	Samanod	0.777,3.996,7.002	0.777,2.997,5.004	1.665,3.892,7.002	1.665,3.892,7.002	0.333,2.22,3.892
	Qotur	3.892,7.002,9	2.331,5.004,7.002	1.665,3.892,7.002	2.78,5.446,9	0.333,2.22,5.446
			Compute the Fuzzy Positive Ideal Solution (FPIS)
			Compute the Fuzzy Negative Ideal Solution (FNIS)
	Criteria	Population growth	Employment	Local development	Area	Socio-economic conditions
	Mahala	5.446,9,9	5.446,9,9	2.78,5.446,9	3.89,7,9	1.668,3.89,7
	Tanta	5.446,9,9	5.446,9,9	2.78,5.446,9	3.89,7,9	1.668,3.89,7
	Basun	0.777,3.996,7.002	0.777,2.997,5.004	0.555,3.108,7.002	1.665,3.892,7.002	0.333,2.22,5.446
	Zefta	2.331,6.003,9	0.777,3.996,7.002	0.555,3.108,7.002	1.665,3.892,7.002	0.333,2.22,3.892
	Santa	0.777,3.996,7.002	0.777,3.996,7.002	0.555,3.108,7.002	1.665,3.892,7.002	0.333,2.22,5.446
	Kafr Elzayat	3.892,7.002,9	3.892,7.002,9	1.665,3.892,7.002	2.78,5.446,9	0.333,2.22,5.446
	Samanod	0.777,3.996,7.002	0.777,2.997,5.004	1.665,3.892,7.002	1.665,3.892,7.002	0.333,2.22,3.892
	Qotur	3.892,7.002,9	2.331,5.004,7.002	1.665,3.892,7.002	2.78,5.446,9	0.333,2.22,5.446
	A*	5.446,9,9	5.446,9,9	2.78,5.446,9	3.89,7,9	1.668,3.89,7
	A-	0.777,3.996,7.002	0.777,2.997,5.004	0.555,3.108,7.002	1.665,3.892,7.002	0.333,2.22,3.892
			Compute the distance from each alternative to the FPIS
	Criteria	Population growth	Employment	Local development	Area	Socio-economic conditions		di*
	Mahala	0	0	0	0	0		0
	Tanta	0	0	0	0	0		0
	Basun	4.116	4.96	2.192	2.49	1.526		15.284
	Zefta	2.496	4.116	2.192	2.49	2.178		13.472
	Santa	4.116	4.116	2.192	2.49	1.526		14.44
	Kafr Elzayat	1.461	1.461	1.597	1.103	1.526		7.148
	Samanod	4.116	4.96	1.597	2.49	2.178		15.341
	Qotur	1.461	3.144	1.597	1.103	1.526		8.831
			Compute the distance from each alternative to the FNIS
	Criteria	Population growth	Employment	Local development	Area	Socio-economic conditions		di-
	Mahala	4.116	4.96	2.192	2.49	2.178		15.936
	Tanta	4.116	4.96	2.192	2.49	2.178		15.936
	Basun	0	0	0	0	0.897		0.897
	Zefta	1.865	1.29	0	0	0		3.155
	Santa	0	1.29	0	0	0.897		2.187
	Kafr Elzayat	2.753	3.729	0.785	1.597	0.897		9.761
	Samanod	0	0	0.785	0	0		0.785
	Qotur	2.753	1.865	0.785	1.597	0.897		7.897
	Compute the closeness coefficient Cci for each alternative
	Criteria	di*	di-	Cci	Rank	Risk Level
	Mahala	0	15.936	1	1	V. High
	Tanta	0	15.936	1	2	V. High
	Basun	15.284	0.897	0.055	7	Moderate
	Zefta	13.472	3.155	0.19	5	Moderate
	Santa	14.44	2.187	0.132	6	Moderate
	Kafr Elzayat	7.148	9.761	0.577	3	High
	Samanod	15.341	0.785	0.049	8	Low
	Qotur	8.831	7.897	0.472	4	High
